# Supplementary material
Source: PubMed Central journal article supplement (PMC5978697)

# Supporting Information

## Table of Contents

|                                                                                                                                                          |       |
|----------------------------------------------------------------------------------------------------------------------------------------------------------|-------|
| <b>Table S1.</b> Relative sialidase activities of Pd2,6ST S232L/T356S/W361F towards different sialosides.....                                            | S2    |
| <b>Figure S1.</b> Sequential saturation mutagenesis and blue-white colony screening of Pd2,6ST mutants for enhanced $\alpha$ 2–6-sialidase activity..... | S2    |
| <b>Figure S2.</b> Effect of CMP concentration on Pd2,6ST S232L/T356S/W361F neosialidase reaction rate.....                                               | S3    |
| <b>Figure S3.</b> HRMS detection of intermediate CMP-Neu5Ac formation by Pd2,6ST S232L/T356S/W361F neosialidase activity.....                            | S4    |
| <b>Figure S4.</b> HPLC detection of Pd2,6ST S232L/T356S/W361F neosialidase activity towards egg yolk sialoglycopeptide.....                              | S5    |
| <b>Figure S5.</b> HRMS detection of Pd2,6ST S232L/T356S/W361F neosialidase activity towards egg yolk sialoglycopeptide.....                              | S6–S7 |
| $^1\text{H}$ and $^{13}\text{C}$ NMR spectra of Neu5Ac $\alpha$ 2–6Gal $\beta$ X (1) .....                                                               | S8    |

**Table S1.** Relative sialidase activities of Pd2,6ST S232L/T356S/W361F towards different sialosides.

| Compound number | Compound abbreviation                                 | Relative sialidase activity |
|-----------------|-------------------------------------------------------|-----------------------------|
| 2               | Neu5Ac $\alpha$ 2-6Gal $\beta$ pNP                    | 1.0                         |
| 3               | Neu5Ac $\alpha$ 2-3Gal $\beta$ pNP                    | $2.5 \times 10^{-3}$        |
| 4               | Neu5Ac $\alpha$ 2-8Neu5Ac $\alpha$ 2-3Gal $\beta$ pNP | $3.3 \times 10^{-3}$        |
| 5               | Kdn $\alpha$ 2-6Gal $\beta$ pNP                       | $9.8 \times 10^{-4}$        |
| 6               | Neu5Gc $\alpha$ 2-6Gal $\beta$ pNP                    | $1.2 \times 10^{-1}$        |
| 7               | Neu5Ac $\alpha$ 2-6GalNAc $\beta$ pNP                 | 1.9                         |

**Figure S1.** Sequential saturation mutagenesis and blue-white colony screening of Pd2,6ST mutants for enhanced  $\alpha$ 2-6-sialidase activity.

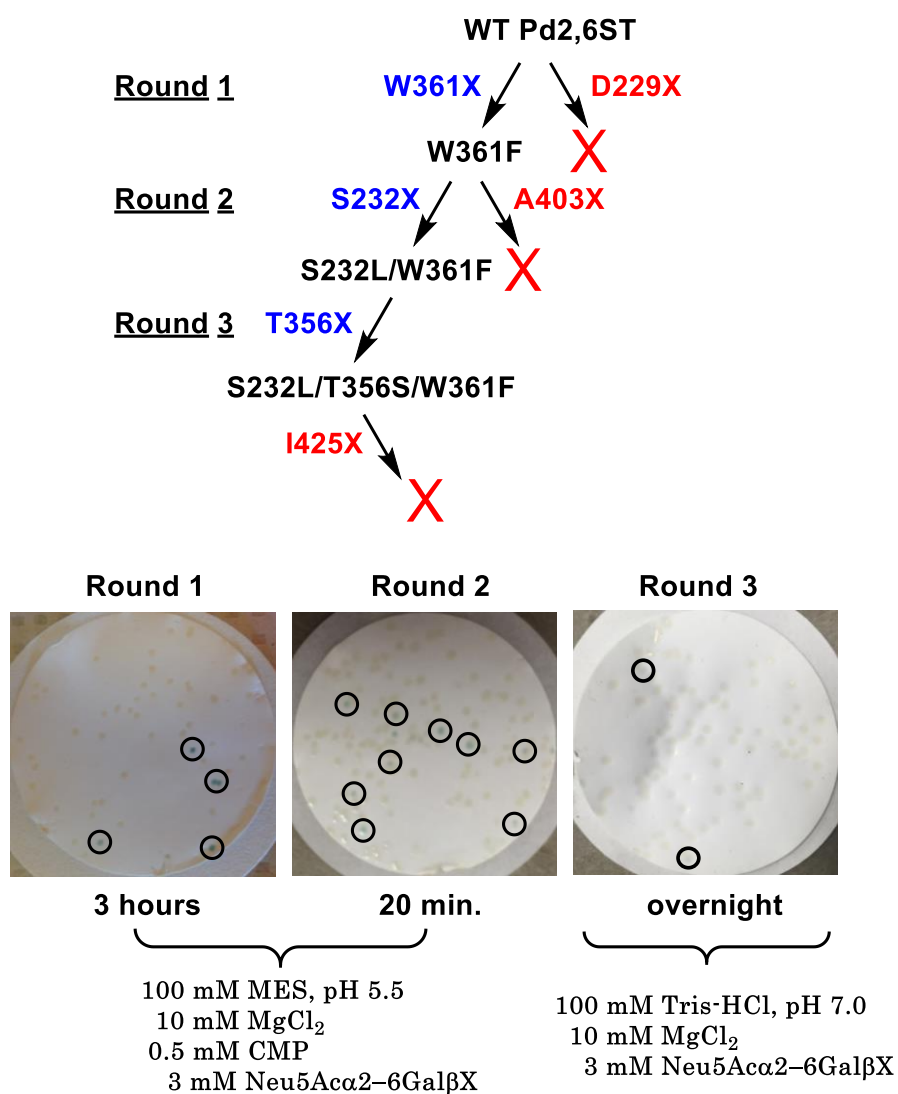

**Figure S2.** Effect of CMP concentration (0.1, 0.2, 0.5, 1, 2, 5, 10, and 25 mM) on Pd2,6ST S232L/T356S/W361F neosialidase reaction rate.

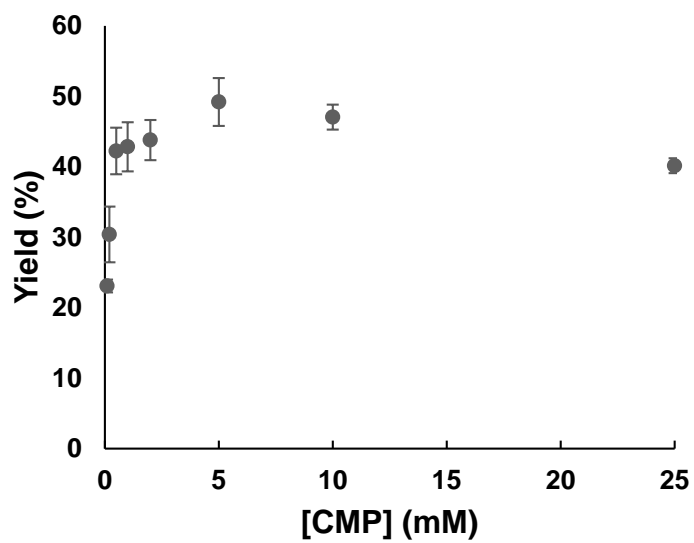

**Figure S3.** **A)** HRMS detection of intermediate CMP-Neu5Ac formation by the neosialidase activity of Pd2,6ST S232L/T356S/W361F. **B)** and **C)** are enlarged  $m/z$  regions in **A)**. Signals for M-1 molecular ions of Neu5Ac (Calcd. 308.0987, found 308.0976), CMP (Calcd. 322.0440, found 322.0435), CMP-Neu5Ac (Calcd. 613.1400, found 613.1356), and Neu5Ac $\alpha$ 2-6Lac $\beta$ MU (Calcd. 790.2411, found 790.2372) were observed.

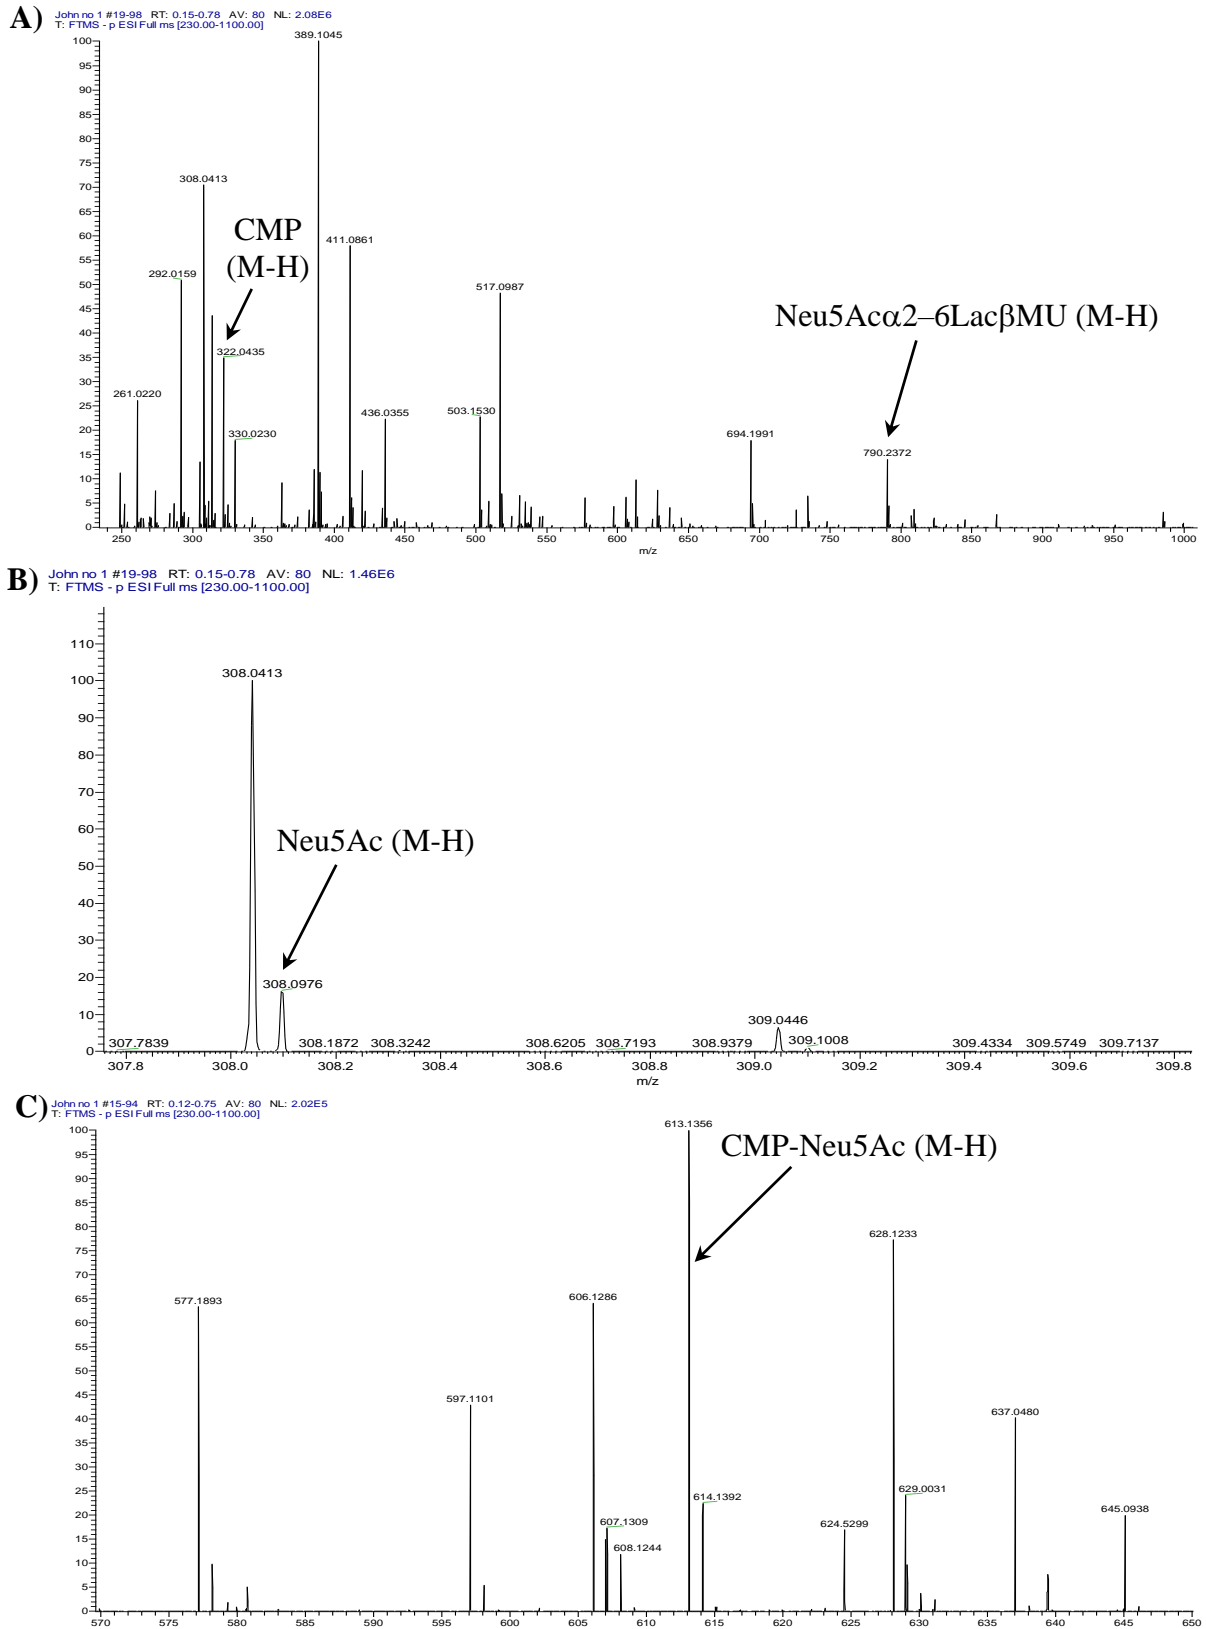

**Figure S4.** HPLC detection of Pd2,6ST S232L/T356S/W361F neosialidase activity toward egg yolk sialoglycopeptide. **A)** no-enzyme control; **B)** neosialidase enzymatic reaction; **C)** enzymatic reaction mixed with egg yolk sialoglycopeptide substrate standard.

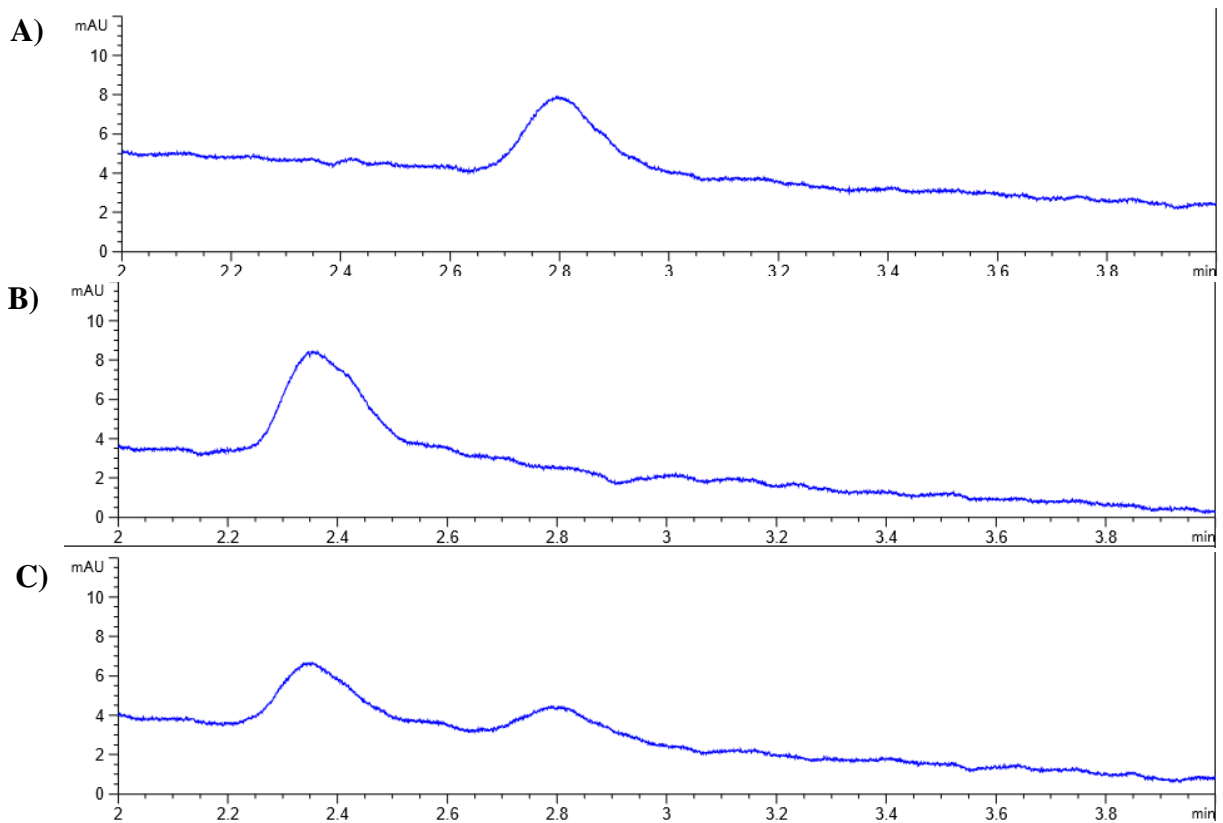

**Figure S5.** HRMS detection of Pd2,6ST S232L/T356S/W361F neosialidase activity towards egg yolk sialoglycopeptide. Signals for (M+3)/2 ions were observed for the disialyl (Calcd. 1433.0924, found 1433.0910) in the no-enzyme control (**A**) and asialo glycopeptides (Calcd. 1141.9969, found 1141.9967) in the neosialidase reaction (**B**). Monosialylated glycopeptide was not detected. Structures of the glycopeptides are shown.

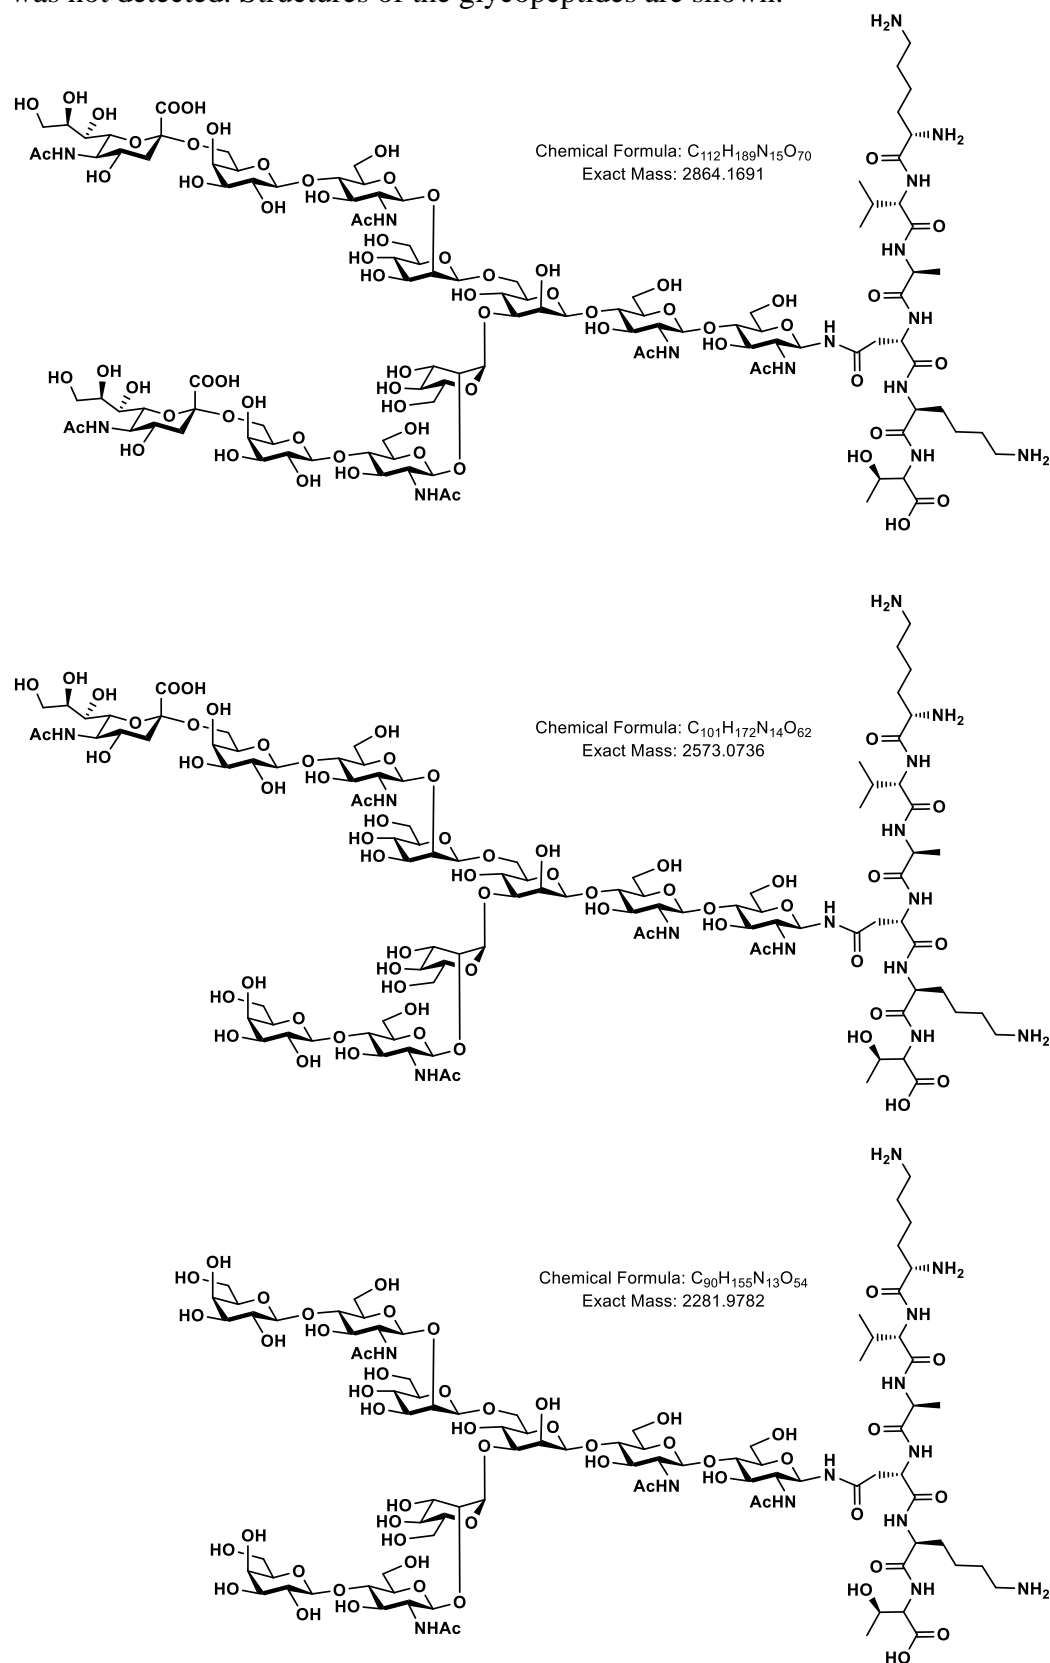

jm-NOENZYME\_pos #12-104 RT: 0.18-1.71 AV: 93 NL: 5.87E4  
T: FTMS + p ESI Full ms [200.00-2000.00]

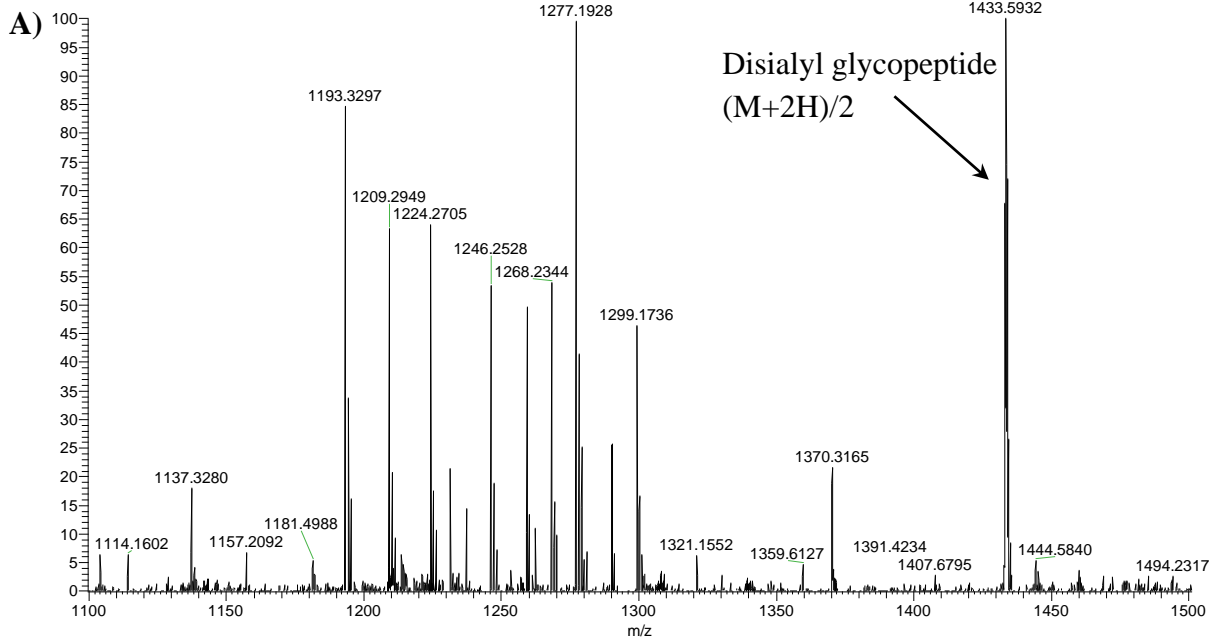

jm-1X\_pos #19-123 RT: 0.29-2.01 AV: 105 NL: 1.45E5  
T: FTMS + p ESI Full ms [200.00-2000.00]

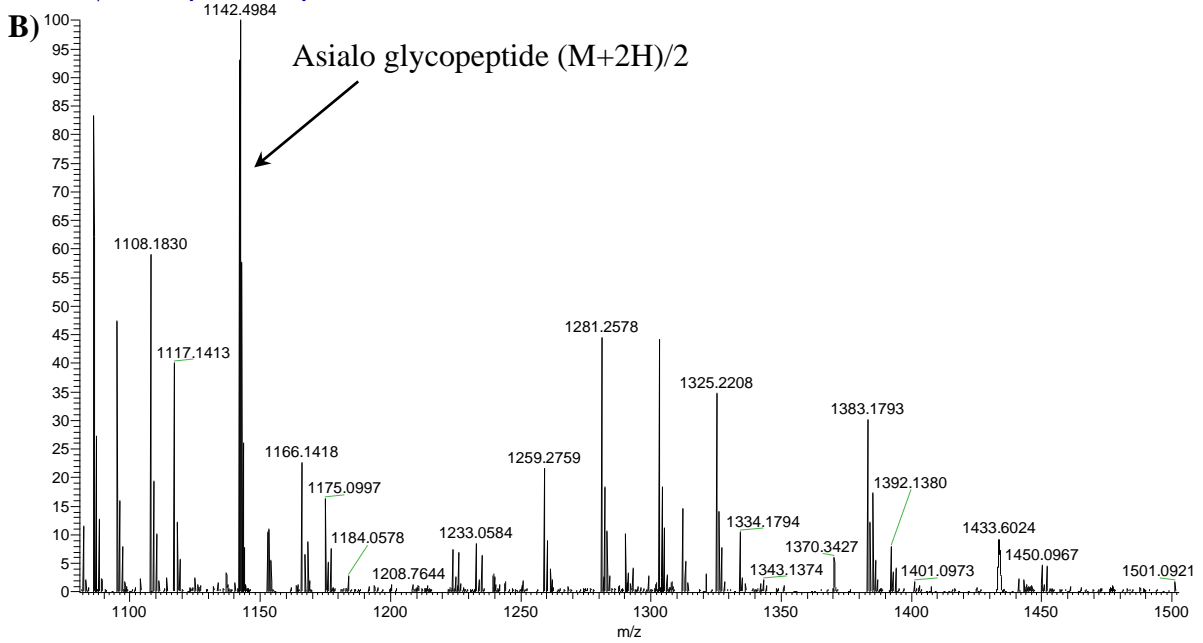

$^1\text{H}$  and  $^{13}\text{C}$  NMR spectra of Neu5Ac $\alpha$ 2-6Gal $\beta$ X (1)

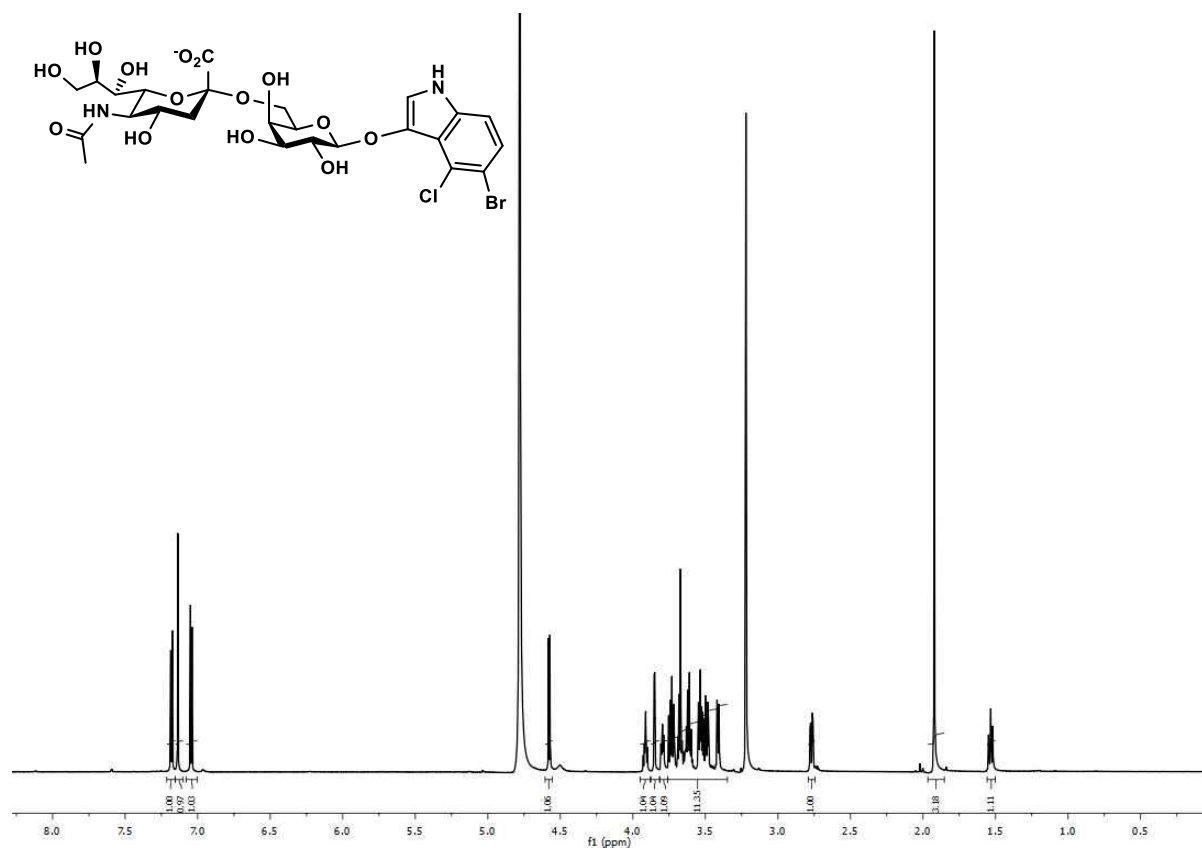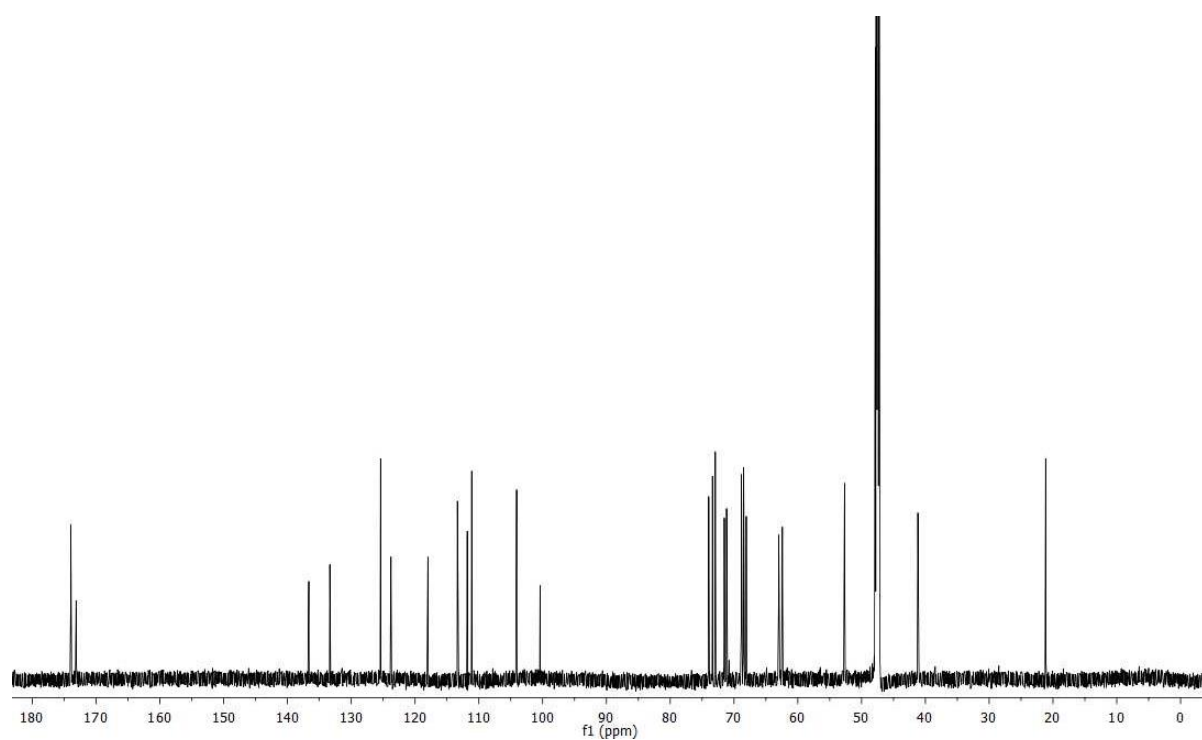

Supplement: NIHMS970329-supplement-SI.pdf [file NIHMS970329-supplement-SI.pdf]
